# Supplementary material
Source: publisher figshare collection journal article supplement (https://frontiersin.figshare.com/ndownloader/files/28095417)
Supplement: Supplementary file 1 [file 28095417]

Bayesian predictions of bark beetle attack and mortality of three conifer species during epidemic and endemic population stages

Mario Bretfeld*, Heather N. Speckman, Daniel P. Beverly, Brent E. Ewers

Supplementary Material

***Correspondence:**Mario Bretfeld
[m.bretfeld@gmail.com](mailto:m.bretfeld@gmail.com)


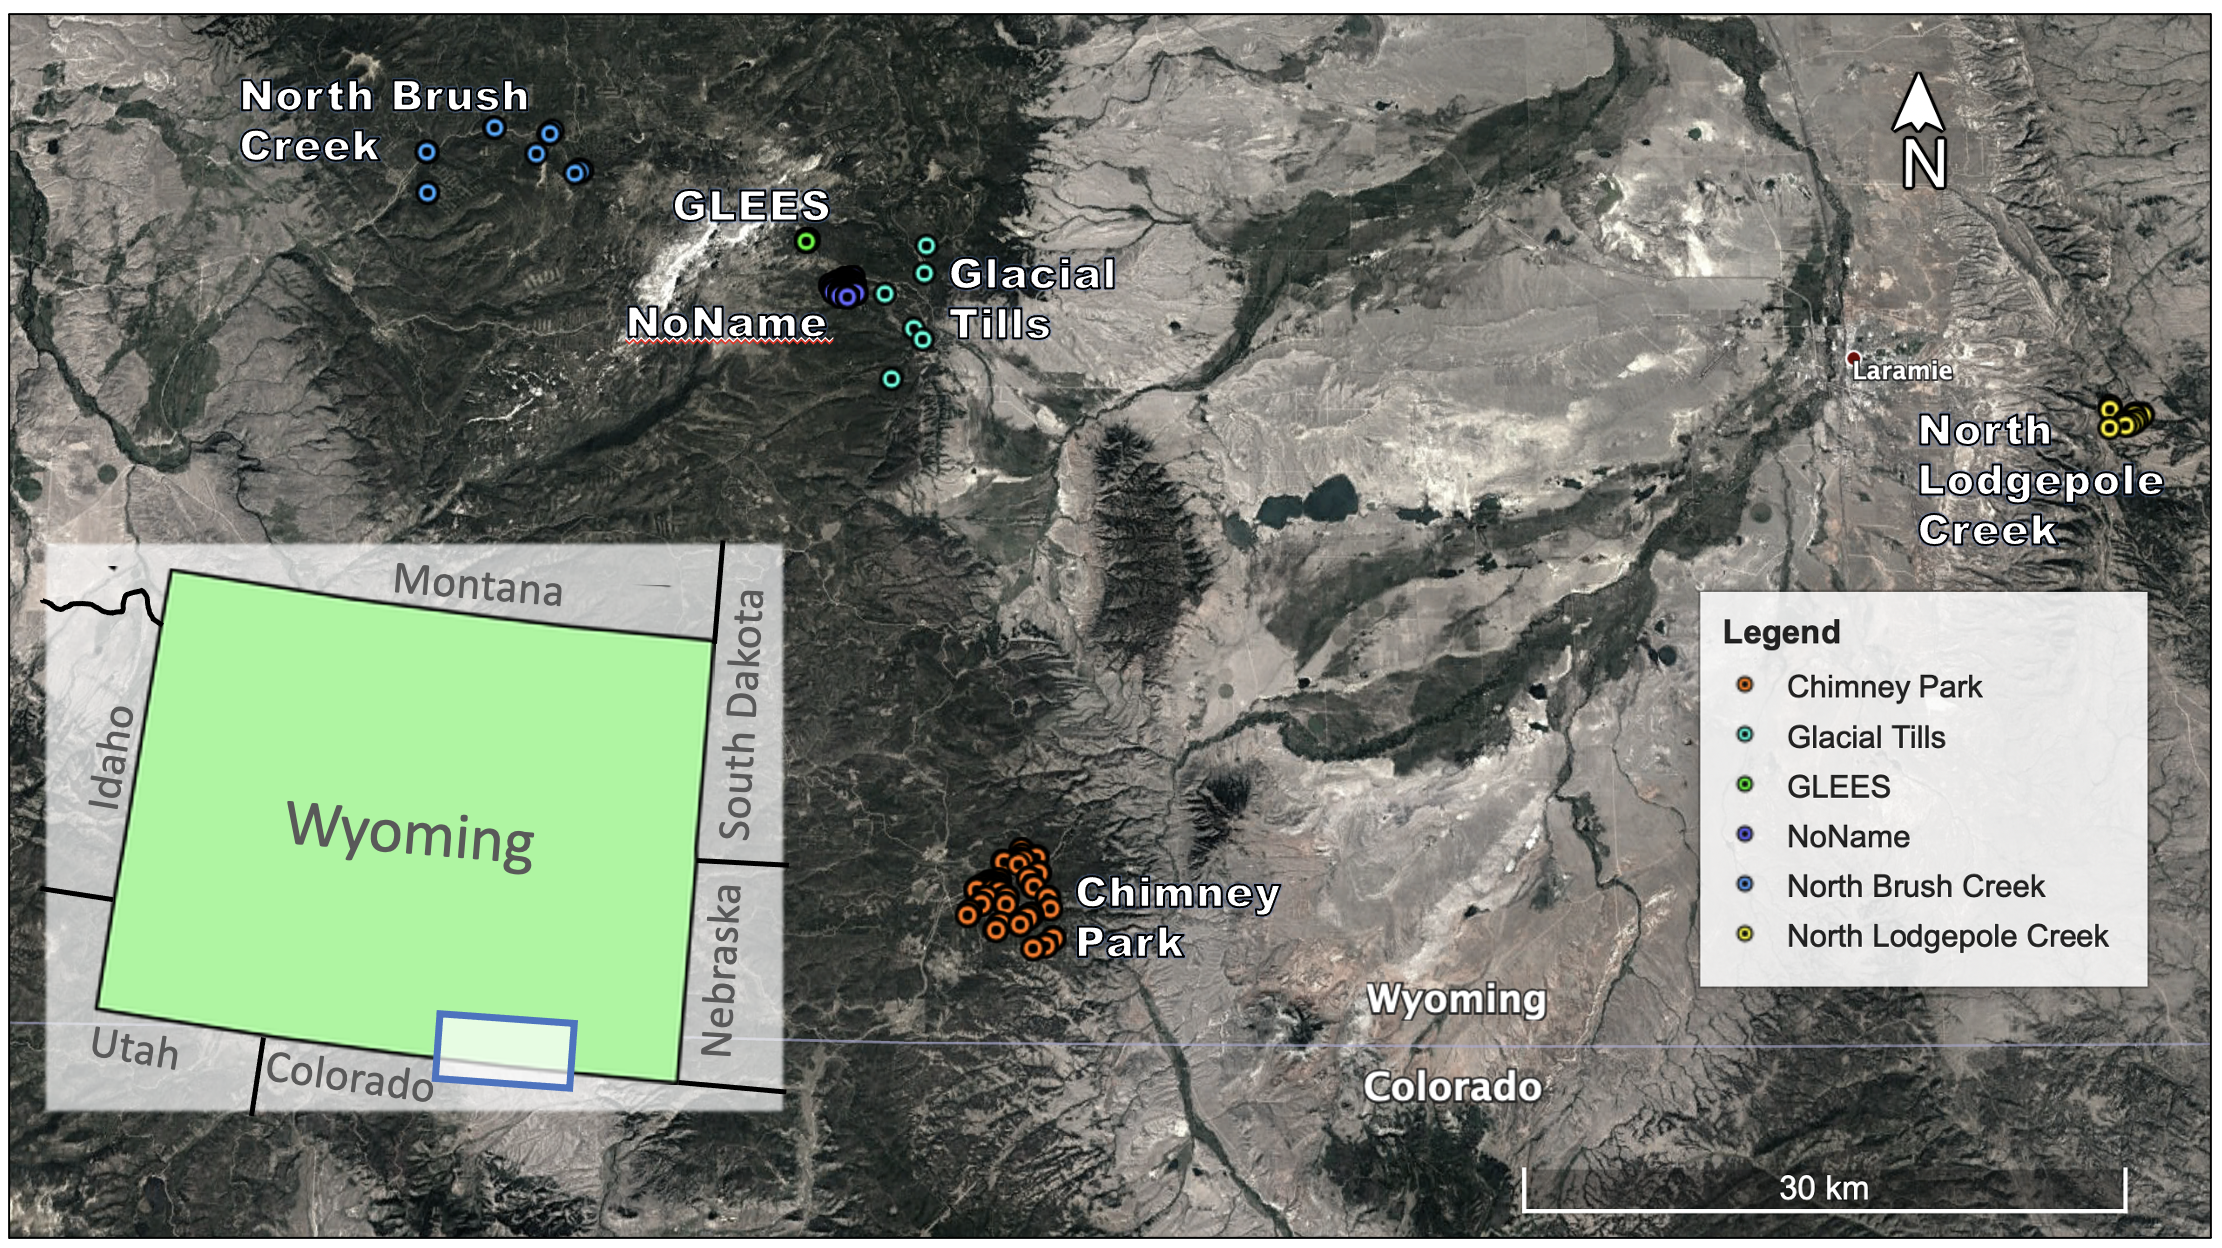


Supplementary Figure 1: Location of sampling sites in southeastern Wyoming.

Supplementary Figure 2: Overview of sampled lodgepole pine (PICO; *a*), subalpine fir (ABLA; *b*) and Engelmann spruce (PIEN; c) trees in each year.

**Lodgepole Pine**

Supplementary Figure 3: Observed data (bars) and posterior probabilities (line) for lodgepole pine from 2008 to 2010. The orange line indicates the posterior median, the bands the 50% (darker) and 94% (lighter) credible intervals. Bars represent proportions of trees by status in bins corresponding to 2 cm diameter at breast height (DBH) increments. Bar coloration indicates status: healthy (green foliage, no signs of beetle activity), BG (beetle-green; green foliage, clear signs of beetle activity), BR (beetle-red; foliage red, clear signs of beetle activity), BD (beetle-dead; foliage missing, clear signs of beetle activity).

Supplementary Figure 4: Observed data (bars) and posterior probabilities (line) for lodgepole pine from 2011 to 2013. The orange line indicates the posterior median, the bands the 50% (darker) and 94% (lighter) credible intervals. Bars represent proportions of trees by status in bins corresponding to 2 cm diameter at breast height (DBH) increments. Bar coloration indicates status: healthy (green foliage, no signs of beetle activity), BG (beetle-green; green foliage, clear signs of beetle activity), BR (beetle-red; foliage red, clear signs of beetle activity), BD (beetle-dead; foliage missing, clear signs of beetle activity).

Supplementary Figure 5: Observed data (bars) and posterior probabilities (line) for lodgepole pine from 2014 to 2016. The orange line indicates the posterior median, the bands the 50% (darker) and 94% (lighter) credible intervals. Bars represent proportions of trees by status in bins corresponding to 2 cm diameter at breast height (DBH) increments. Bar coloration indicates status: healthy (green foliage, no signs of beetle activity), BG (beetle-green; green foliage, clear signs of beetle activity), BR (beetle-red; foliage red, clear signs of beetle activity), BD (beetle-dead; foliage missing, clear signs of beetle activity).

Supplementary Figure 6: Observed data (bars) and posterior probabilities (line) for lodgepole pine from 2017 to 2019. The orange line indicates the posterior median, the bands the 50% (darker) and 94% (lighter) credible intervals. Bars represent proportions of trees by status in bins corresponding to 2 cm diameter at breast height (DBH) increments. Bar coloration indicates status: healthy (green foliage, no signs of beetle activity), BG (beetle-green; green foliage, clear signs of beetle activity), BR (beetle-red; foliage red, clear signs of beetle activity), BD (beetle-dead; foliage missing, clear signs of beetle activity).

**Lodgepole Pine (Year-to-Year)**

Supplementary Figure 7: Observed data (bars) and posterior probabilities (line) for lodgepole pine from 2008 to 2010 based on year-to-year mortality. The orange line indicates the posterior median, the bands the 50% (darker) and 94% (lighter) credible intervals. Bars represent proportions of trees by status in bins corresponding to 2 cm diameter at breast height (DBH) increments. Bar coloration indicates status: healthy (green foliage, no signs of beetle activity), BG (beetle-green; green foliage, clear signs of beetle activity), BR (beetle-red; foliage red, clear signs of beetle activity), BD (beetle-dead; foliage missing, clear signs of beetle activity).

Supplementary Figure 8: Observed data (bars) and posterior probabilities (line) for lodgepole pine from 2011 to 2013 based on year-to-year mortality. The orange line indicates the posterior median, the bands the 50% (darker) and 94% (lighter) credible intervals. Bars represent proportions of trees by status in bins corresponding to 2 cm diameter at breast height (DBH) increments. Bar coloration indicates status: healthy (green foliage, no signs of beetle activity), BG (beetle-green; green foliage, clear signs of beetle activity), BR (beetle-red; foliage red, clear signs of beetle activity), BD (beetle-dead; foliage missing, clear signs of beetle activity).

Supplementary Figure 9: Observed data (bars) and posterior probabilities (line) for lodgepole pine from 2014 to 2016 based on year-to-year mortality. The orange line indicates the posterior median, the bands the 50% (darker) and 94% (lighter) credible intervals. Bars represent proportions of trees by status in bins corresponding to 2 cm diameter at breast height (DBH) increments. Bar coloration indicates status: healthy (green foliage, no signs of beetle activity), BG (beetle-green; green foliage, clear signs of beetle activity), BR (beetle-red; foliage red, clear signs of beetle activity), BD (beetle-dead; foliage missing, clear signs of beetle activity).

Supplementary Figure 10: Observed data (bars) and posterior probabilities (line) for lodgepole pine in 2017 based on year-to-year mortality. The orange line indicates the posterior median, the bands the 50% (darker) and 94% (lighter) credible intervals. Bars represent proportions of trees by status in bins corresponding to 2 cm diameter at breast height (DBH) increments. Bar coloration indicates status: healthy (green foliage, no signs of beetle activity), BG (beetle-green; green foliage, clear signs of beetle activity), BR (beetle-red; foliage red, clear signs of beetle activity), BD (beetle-dead; foliage missing, clear signs of beetle activity).

**Subalpine Fir**

Supplementary Figure 11: Observed data (bars) and posterior probabilities (line) for subalpine fir from 2009 to 2011. The orange line indicates the posterior median, the bands the 50% (darker) and 94% (lighter) credible intervals. Bars represent proportions of trees by status in bins corresponding to 2 cm diameter at breast height (DBH) increments. Bar coloration indicates status: healthy (green foliage, no signs of beetle activity), BG (beetle-green; green foliage, clear signs of beetle activity), BR (beetle-red; foliage red, clear signs of beetle activity), BD (beetle-dead; foliage missing, clear signs of beetle activity).

Supplementary Figure 12: Observed data (bars) and posterior probabilities (line) for subalpine fir from 2012 to 2014. The orange line indicates the posterior median, the bands the 50% (darker) and 94% (lighter) credible intervals. Bars represent proportions of trees by status in bins corresponding to 2 cm diameter at breast height (DBH) increments. Bar coloration indicates status: healthy (green foliage, no signs of beetle activity), BG (beetle-green; green foliage, clear signs of beetle activity), BR (beetle-red; foliage red, clear signs of beetle activity), BD (beetle-dead; foliage missing, clear signs of beetle activity).

Supplementary Figure 13: Observed data (bars) and posterior probabilities (line) for subalpine fir from 2015 to 2017. The orange line indicates the posterior median, the bands the 50% (darker) and 94% (lighter) credible intervals. Bars represent proportions of trees by status in bins corresponding to 2 cm diameter at breast height (DBH) increments. Bar coloration indicates status: healthy (green foliage, no signs of beetle activity), BG (beetle-green; green foliage, clear signs of beetle activity), BR (beetle-red; foliage red, clear signs of beetle activity), BD (beetle-dead; foliage missing, clear signs of beetle activity).

**Engelmann Spruce**

Supplementary Figure 14: Observed data (bars) and posterior probabilities (line) for Engelmann spruce from 2009 to 2011. The orange line indicates the posterior median, the bands the 50% (darker) and 94% (lighter) credible intervals. Bars represent proportions of trees by status in bins corresponding to 2 cm diameter at breast height (DBH) increments. Bar coloration indicates status: healthy (green foliage, no signs of beetle activity), BG (beetle-green; green foliage, clear signs of beetle activity), BR (beetle-red; foliage red, clear signs of beetle activity), BD (beetle-dead; foliage missing, clear signs of beetle activity).

Supplementary Figure 15: Observed data (bars) and posterior probabilities (line) for Engelmann spruce from 2012 to 2014. The orange line indicates the posterior median, the bands the 50% (darker) and 94% (lighter) credible intervals. Bars represent proportions of trees by status in bins corresponding to 2 cm diameter at breast height (DBH) increments. Bar coloration indicates status: healthy (green foliage, no signs of beetle activity), BG (beetle-green; green foliage, clear signs of beetle activity), BR (beetle-red; foliage red, clear signs of beetle activity), BD (beetle-dead; foliage missing, clear signs of beetle activity).

Supplementary Figure 16: Observed data (bars) and posterior probabilities (line) for Engelmann spruce from 2015 to 2017. The orange line indicates the posterior median, the bands the 50% (darker) and 94% (lighter) credible intervals. Bars represent proportions of trees by status in bins corresponding to 2 cm diameter at breast height (DBH) increments. Bar coloration indicates status: healthy (green foliage, no signs of beetle activity), BG (beetle-green; green foliage, clear signs of beetle activity), BR (beetle-red; foliage red, clear signs of beetle activity), BD (beetle-dead; foliage missing, clear signs of beetle activity).

Supplementary Figure 17: Average diameter at breast height (DBH) in cm of all sampled live trees (healthy and beetle-green) per year and species, with the shaded bands indicating the standard error around the mean. PICO: lodgepole pine; ABLA: subalpine fir; PIEN: Engelmann spruce.

Supplementary Figure 18: Time series of total understory vascular plant cover (*a*), density of total seedlings (*b*) by severity of bark beetle caused overstory mortality, and density of seedlings as a function of the percentage of basal area killed by bark beetles (*c*) in mixed dominated stands (i.e., single species basal area contribution larger than 75%). Lines in *a* and *b* represent mean values, bands indicate standard errors. Lines in *c* represent the means of the posterior distributions, grey bands indicate 95% credible intervals of the predicted seedling density.

# Tables

Supplementary Table 1: Detailed list of year-to-year sampling sizes and total sampling area at each site.

| **Year** | **Site** | **Stands** | **Stand Names** | **Plots** | **Plot Names** | **Area [m2]** |
| --- | --- | --- | --- | --- | --- | --- |
| 2005 | GLEES | 9 | MS11, MS12, MS13, MS16, MS6, MS7, MS8, MS3, MS9 | 31 | MS11_1, MS11_2, MS11_3, MS12_2, MS12_3, MS13_1, MS13_2, MS13_3, MS13_4, MS16_3, MS6_1, MS6_2, MS6_3, MS6_4, MS7_1, MS7_2, MS7_3, MS7_4, MS8_1, MS8_2, MS8_3, MS8_4, MS11_4, MS12_1, MS12_4, MS16_2, MS3_3, MS9_1, MS9_2, MS9_3, MS9_4 | 6233 |
| 2008 | Chimney Park | 4 | BB1, BB2, EC, UT | 20 | BB1_1, BB1_2, BB1_3, BB1_4, BB1_5, BB2_1, BB2_2, BB2_3, BB2_4, BB2_5, EC_1, EC_2, EC_3, EC_4, EC_5, UT_1, UT_2, UT_3, UT_4, UT_5 | 1790 |
| 2009 | Chimney Park | 4 | BB1, BB2, EC, UT | 20 | BB1_1, BB1_2, BB1_3, BB1_4, BB1_5, BB2_1, BB2_2, BB2_3, BB2_4, BB2_5, EC_1, EC_2, EC_3, EC_4, EC_5, UT_1, UT_2, UT_3, UT_4, UT_5 | 1790 |
| 2009 | GLEES | 9 | MS11, MS12, MS13, MS16, MS6, MS7, MS8, MS3, MS9 | 31 | MS11_1, MS11_2, MS11_3, MS12_2, MS12_3, MS13_1, MS13_2, MS13_3, MS13_4, MS16_3, MS6_1, MS6_2, MS6_3, MS6_4, MS7_1, MS7_2, MS7_3, MS7_4, MS8_1, MS8_2, MS8_3, MS8_4, MS11_4, MS12_1, MS12_4, MS16_2, MS3_3, MS9_1, MS9_2, MS9_3, MS9_4 | 6233 |
| 2010 | Chimney Park | 6 | BB1, BB2, CC, EC, RG, UT | 30 | BB1_1, BB1_2, BB1_3, BB1_4, BB1_5, BB2_1, BB2_2, BB2_3, BB2_4, BB2_5, CC_1, CC_2, CC_3, CC_4, CC_5, EC_1, EC_2, EC_3, EC_4, EC_5, RG_1, RG_2, RG_3, RG_4, RG_5, UT_1, UT_2, UT_3, UT_4, UT_5 | 2585 |
| 2010 | Chimney Park (EX) | 2 | LP, UP | 6 | LP_1, LP_2, LP_3, UP_1, UP_2, UP_3 | 900 |
| 2010 | GLEES | 9 | MS11, MS12, MS13, MS16, MS6, MS7, MS8, MS3, MS9 | 31 | MS11_1, MS11_2, MS11_3, MS12_2, MS12_3, MS13_1, MS13_2, MS13_3, MS13_4, MS16_3, MS6_1, MS6_2, MS6_3, MS6_4, MS7_1, MS7_2, MS7_3, MS7_4, MS8_1, MS8_2, MS8_3, MS8_4, MS11_4, MS12_1, MS12_4, MS16_2, MS3_3, MS9_1, MS9_2, MS9_3, MS9_4 | 6233 |
| 2011 | Chimney Park | 6 | BB1, BB2, CC, EC, RG, UT | 30 | BB1_1, BB1_2, BB1_3, BB1_4, BB1_5, BB2_1, BB2_2, BB2_3, BB2_4, BB2_5, CC_1, CC_2, CC_3, CC_4, CC_5, EC_1, EC_2, EC_3, EC_4, EC_5, RG_1, RG_2, RG_3, RG_4, RG_5, UT_1, UT_2, UT_3, UT_4, UT_5 | 2585 |
| 2011 | Chimney Park (EX) | 2 | LP, UP | 6 | LP_1, LP_2, LP_3, UP_1, UP_2, UP_3 | 900 |
| 2011 | GLEES | 11 | H, L, MS11, MS12, MS13, MS16, MS6, MS7, MS8, MS3, MS9 | 40 | H_3, H_5, L_1, L_2, L_3, L_4, MS11_1, MS11_2, MS11_3, MS12_2, MS12_3, MS13_1, MS13_2, MS13_3, MS13_4, MS16_3, MS6_1, MS6_2, MS6_3, MS6_4, MS7_1, MS7_2, MS7_3, MS7_4, MS8_1, MS8_2, MS8_3, MS8_4, H_2, H_4, L_5, MS11_4, MS12_1, MS12_4, MS16_2, MS3_3, MS9_1, MS9_2, MS9_3, MS9_4 | 6674 |
| 2011 | North Brush Creek | 7 | CC01, MC01, MC02, MC05, SF01, SFUT, LP | 19 | CC01_1, CC01_2, CC01_3, MC01_1, MC01_2, MC01_3, MC02_1, MC02_3, MC05_1, MC05_2, SF01_1, SF01_2, SF01_3, SF01_4, SFUT_1, LP_1, LP_2, LP_3, MC02_2 | 1840 |
| 2012 | Chimney Park | 6 | BB1, BB2, CC, EC, RG, UT | 30 | BB1_1, BB1_2, BB1_3, BB1_4, BB1_5, BB2_1, BB2_2, BB2_3, BB2_4, BB2_5, CC_1, CC_2, CC_3, CC_4, CC_5, EC_1, EC_2, EC_3, EC_4, EC_5, RG_1, RG_2, RG_3, RG_4, RG_5, UT_1, UT_2, UT_3, UT_4, UT_5 | 2585 |
| 2012 | Chimney Park (EX) | 33 | 103, 104, 46, 93, 94, 14, 17, 18, 2, 21, 23, 28, 3, 30, 33, 35, 5, 50, 52, 53, 55, 57, 59, 6, 75, 77, 84, 85, 9, 97, 98, LP, UP | 87 | 103_266, 103_267, 104_268, 104_269, 46_129, 93_244, 93_245, 94_247, 14_41, 14_42, 14_43, 17_50, 17_51, 17_52, 18_53, 18_54, 18_55, 2_6, 2_7, 2_8, 21_61, 21_62, 23_66, 23_67, 23_68, 28_79, 28_80, 28_81, 3_10, 3_11, 3_9, 30_83, 30_84, 30_85, 33_92, 35_96, 35_97, 35_98, 46_128, 46_130, 5_15, 5_16, 50_140, 50_141, 50_142, 52_146, 53_147, 53_148, 53_149, 55_153, 55_154, 55_155, 57_157, 57_158, 57_159, 59_163, 59_164, 59_165, 6_17, 6_18, 6_19, 75_200, 75_201, 75_202, 77_206, 77_207, 77_208, 84_227, 84_228, 85_229, 85_230, 85_231, 9_26, 9_27, 9_28, 93_243, 94_246, 97_253, 97_254, 98_255, 98_256, LP_1, LP_2, LP_3, UP_1, UP_2, UP_3 | 7557 |
| 2012 | GLEES | 2 | H, L | 10 | H_3, H_5, L_1, L_2, L_3, L_4, H_1, H_2, H_4, L_5 | 490 |
| 2013 | Chimney Park | 6 | BB1, BB2, CC, EC, RG, UT | 30 | BB1_1, BB1_2, BB1_3, BB1_4, BB1_5, BB2_1, BB2_2, BB2_3, BB2_4, BB2_5, CC_1, CC_2, CC_3, CC_4, CC_5, EC_1, EC_2, EC_3, EC_4, EC_5, RG_1, RG_2, RG_3, RG_4, RG_5, UT_1, UT_2, UT_3, UT_4, UT_5 | 2585 |
| 2013 | Glacial Till | 3 | PB, PD, BL | 15 | PB_1, PB_2, PB_3, PB_5, PD_3, BL_1, BL_2, BL_3, BL_4, BL_5, PB_4, PD_1, PD_2, PD_4, PD_5 | 1544 |
| 2013 | GLEES | 2 | H, L | 10 | H_3, H_5, L_1, L_2, L_3, L_4, H_1, H_2, H_4, L_5 | 490 |
| 2013 | North Lodgepole Creek | 1 | NLC | 9 | NLC_N3L, NLC_N1H, NLC_N3H, NLC_N3M, NLC_N4H, NLC_N4L, NLC_N4M, NLC_S5H, NLC_S5L | 1265 |
| 2014 | Chimney Park | 6 | BB1, BB2, CC, EC, RG, UT | 29 | BB1_1, BB1_2, BB1_3, BB1_4, BB1_5, BB2_1, BB2_2, BB2_3, BB2_4, BB2_5, CC_1, CC_2, CC_3, CC_4, EC_1, EC_2, EC_3, EC_4, EC_5, RG_1, RG_2, RG_3, RG_4, RG_5, UT_1, UT_2, UT_3, UT_4, UT_5 | 2536 |
| 2014 | GLEES | 2 | H, L | 9 | H_3, H_5, L_2, L_3, L_4, L_5, H_2, H_4, L_1 | 441 |
| 2014 | NoName | 3 | NotNF, SF, Trench | 15 | NotNF_1, NotNF_2, SF_1, SF_2, SF_3, SF_4, SF_5, SF_6, Trench_0, Trench_1, Trench_2, Trench_3, Trench_5, Trench_6, Trench_4 | 2800 |
| 2015 | Chimney Park | 6 | BB1, BB2, CC, EC, RG, UT | 30 | BB1_1, BB1_2, BB1_3, BB1_4, BB1_5, BB2_1, BB2_2, BB2_3, BB2_4, BB2_5, CC_1, CC_2, CC_3, CC_4, CC_5, EC_1, EC_2, EC_3, EC_4, EC_5, RG_1, RG_2, RG_3, RG_4, RG_5, UT_1, UT_2, UT_3, UT_4, UT_5 | 2585 |
| 2015 | GLEES | 2 | H, L | 10 | H_2, H_3, H_5, L_1, L_2, L_3, L_4, L_5, H_1, H_4 | 490 |
| 2015 | NoName | 30 | 1, 10, 11, 12, 13, 14, 15, 16, 17, 18, 19, 2, 20, 21, 22, 23, 24, 25, 26, 27, 29, 3, 30, 4, 5, 6, 7, 8, 9, 28 | 233 | 1_1, 1_2, 1_3, 1_4, 1_5, 1_6, 1_7, 1_8, 1_9, 10_1, 10_3, 10_4, 10_5, 10_6, 10_7, 10_8, 10_9, 11_1, 11_2, 11_3, 11_4, 11_5, 11_7, 11_8, 11_9, 12_1, 12_2, 12_3, 12_4, 12_5, 12_6, 12_7, 12_8, 12_9, 13_1, 13_2, 13_3, 13_5, 13_6, 13_7, 13_8, 13_9, 14_1, 14_2, 14_3, 14_4, 14_5, 14_6, 14_7, 14_8, 14_9, 15_1, 15_2, 15_3, 15_6, 15_7, 15_8, 15_9, 16_1, 16_2, 16_3, 16_4, 16_5, 16_6, 16_7, 16_8, 16_9, 17_1, 17_2, 17_4, 17_6, 17_7, 17_9, 18_1, 18_2, 18_3, 18_4, 18_5, 18_7, 18_8, 18_9, 19_1, 19_2, 19_3, 19_4, 19_5, 19_6, 19_7, 19_8, 19_9, 2_1, 2_2, 2_3, 2_4, 2_5, 2_6, 2_7, 2_8, 2_9, 20_1, 20_2, 20_3, 20_4, 20_5, 20_6, 20_7, 20_8, 20_9, 21_1, 21_2, 21_3, 21_4, 21_5, 21_6, 21_7, 21_8, 21_9, 22_1, 22_2, 22_3, 22_4, 22_5, 23_1, 23_2, 23_3, 23_4, 23_5, 24_1, 24_2, 24_3, 24_4, 24_5, 25_1, 25_2, 25_3, 25_4, 25_5, 26_1, 26_2, 26_3, 26_4, 26_5, 27_1, 27_2, 27_3, 27_4, 27_5, 29_2, 29_3, 29_4, 29_5, 3_1, 3_2, 3_3, 3_4, 3_5, 3_6, 3_7, 3_8, 3_9, 30_2, 30_3, 4_1, 4_3, 4_4, 4_7, 4_8, 4_9, 5_1, 5_2, 5_3, 5_4, 5_5, 5_6, 5_7, 5_8, 5_9, 6_1, 6_2, 6_3, 6_4, 6_5, 6_6, 6_7, 6_8, 6_9, 7_1, 7_2, 7_3, 7_4, 7_5, 7_6, 7_7, 7_8, 7_9, 8_1, 8_2, 8_3, 8_4, 8_5, 8_6, 8_7, 8_8, 8_9, 9_1, 9_4, 9_6, 10_2, 11_6, 15_4, 15_5, 17_3, 17_5, 17_8, 18_6, 28_1, 28_2, 28_3, 28_4, 28_5, 29_1, 30_1, 30_4, 30_5, 4_2, 4_5, 4_6, 9_2, 9_3, 9_5, 9_7, 9_8, 9_9 | 6804 |
| 2015 | NoName (HighRes) | 3 | HighResNF, HighResSF, HighResTR | 3 | HighResNF_0, HighResSF_0, HighResTR_0 | 23300 |
| 2016 | Chimney Park | 5 | BB1, BB2, CC, EC, RG | 23 | BB1_1, BB1_2, BB1_3, BB1_4, BB1_5, BB2_1, BB2_2, BB2_3, BB2_4, BB2_5, CC_1, CC_2, CC_3, CC_4, CC_5, EC_1, EC_2, EC_4, RG_1, RG_2, RG_3, RG_4, RG_5 | 2440 |
| 2016 | Chimney Park (EX) | 1 | X | 3 | X_1, X_2, X_3 | 327 |
| 2016 | GLEES | 2 | H, L | 10 | H_2, H_3, H_5, L_1, L_2, L_3, L_4, H_1, H_4, L_5 | 490 |
| 2016 | NoName | 29 | 1, 10, 11, 12, 13, 14, 15, 16, 17, 18, 19, 2, 20, 21, 22, 24, 25, 26, 27, 28, 29, 3, 30, 4, 5, 6, 7, 8, 9 | 221 | 1_1, 1_2, 1_3, 1_4, 1_5, 1_6, 1_7, 1_8, 1_9, 10_1, 10_3, 10_4, 10_5, 10_6, 10_7, 10_8, 10_9, 11_1, 11_2, 11_3, 11_4, 11_5, 11_7, 11_8, 11_9, 12_3, 12_4, 12_5, 12_6, 12_7, 12_8, 12_9, 13_1, 13_2, 13_3, 13_4, 13_5, 13_6, 13_7, 13_8, 13_9, 14_1, 14_2, 14_3, 14_4, 14_5, 14_6, 14_7, 14_8, 14_9, 15_1, 15_2, 15_3, 15_6, 15_7, 15_8, 15_9, 16_1, 16_2, 16_3, 16_4, 16_5, 16_6, 16_7, 16_8, 16_9, 17_1, 17_2, 17_4, 17_5, 17_6, 17_7, 18_1, 18_4, 19_1, 19_2, 19_3, 19_4, 19_5, 19_6, 19_7, 19_8, 19_9, 2_1, 2_2, 2_3, 2_4, 2_5, 2_6, 2_7, 2_8, 2_9, 20_1, 20_2, 20_3, 20_4, 20_5, 20_6, 20_7, 20_8, 20_9, 21_1, 21_2, 21_3, 21_4, 21_5, 21_6, 21_7, 21_8, 21_9, 22_1, 22_2, 22_3, 22_4, 22_5, 24_1, 24_2, 24_3, 24_4, 24_5, 25_1, 25_2, 25_3, 25_4, 25_5, 26_2, 26_3, 26_4, 26_5, 27_1, 27_2, 27_3, 27_4, 27_5, 28_3, 29_3, 29_4, 29_5, 3_1, 3_2, 3_3, 3_4, 3_5, 3_6, 3_7, 3_8, 3_9, 30_3, 30_4, 4_1, 4_3, 4_4, 4_6, 4_7, 4_8, 4_9, 5_1, 5_2, 5_3, 5_4, 5_5, 5_6, 5_7, 5_8, 5_9, 6_1, 6_2, 6_3, 6_5, 6_6, 6_7, 6_8, 6_9, 7_1, 7_2, 7_3, 7_4, 7_5, 7_6, 7_7, 7_8, 7_9, 8_1, 8_2, 8_3, 8_4, 8_5, 8_6, 8_7, 8_8, 8_9, 9_1, 9_6, 9_8, 10_2, 11_6, 15_4, 15_5, 17_3, 17_8, 17_9, 18_2, 18_3, 26_1, 28_1, 28_2, 28_4, 28_5, 29_1, 29_2, 30_1, 30_2, 30_5, 4_2, 4_5, 9_2, 9_3, 9_5, 9_7, 9_9, 9_4 | 22100 |
| 2017 | Chimney Park | 6 | BB1, BB2, CC, EC, RG, UT | 29 | BB1_1, BB1_2, BB1_3, BB1_5, BB2_1, BB2_2, BB2_3, BB2_4, BB2_5, CC_1, CC_2, CC_3, CC_4, CC_5, EC_1, EC_2, EC_3, EC_4, EC_5, RG_1, RG_2, RG_3, RG_4, RG_5, UT_1, UT_2, UT_3, UT_4, UT_5 | 2435 |
| 2017 | GLEES | 2 | H, L | 10 | H_2, H_3, H_5, L_1, L_2, L_3, L_4, L_5, H_1, H_4 | 490 |
| 2017 | NoName | 30 | 1, 10, 11, 12, 13, 14, 15, 16, 17, 18, 19, 2, 20, 21, 22, 23, 24, 25, 26, 27, 28, 29, 3, 30, 4, 5, 6, 7, 8, 9 | 232 | 1_1, 1_2, 1_3, 1_4, 1_5, 1_6, 1_7, 1_8, 1_9, 10_1, 10_3, 10_4, 10_5, 10_6, 10_7, 10_8, 10_9, 11_1, 11_2, 11_3, 11_4, 11_5, 11_7, 11_8, 11_9, 12_1, 12_2, 12_3, 12_4, 12_5, 12_6, 12_7, 12_8, 12_9, 13_1, 13_2, 13_3, 13_4, 13_5, 13_6, 13_7, 13_8, 13_9, 14_1, 14_2, 14_3, 14_4, 14_5, 14_6, 14_7, 14_8, 14_9, 15_1, 15_2, 15_3, 15_6, 15_7, 15_8, 15_9, 16_1, 16_2, 16_3, 16_4, 16_5, 16_6, 16_7, 16_8, 16_9, 17_1, 17_4, 17_6, 17_7, 18_1, 18_2, 18_4, 18_5, 18_7, 18_8, 18_9, 19_1, 19_2, 19_3, 19_4, 19_5, 19_6, 19_7, 19_8, 19_9, 2_1, 2_2, 2_3, 2_4, 2_5, 2_6, 2_7, 2_8, 2_9, 20_1, 20_2, 20_3, 20_4, 20_5, 20_6, 20_7, 20_8, 20_9, 21_1, 21_2, 21_4, 21_5, 21_6, 21_7, 21_8, 21_9, 22_1, 22_2, 22_3, 22_4, 22_5, 23_1, 23_2, 23_3, 23_4, 23_5, 24_1, 24_2, 24_3, 24_4, 24_5, 25_1, 25_2, 25_3, 25_4, 25_5, 26_2, 26_3, 26_4, 26_5, 27_1, 27_2, 27_3, 27_4, 27_5, 28_3, 29_1, 29_3, 29_4, 29_5, 3_1, 3_2, 3_3, 3_4, 3_5, 3_7, 3_8, 3_9, 30_2, 4_1, 4_2, 4_3, 4_4, 4_6, 4_7, 4_8, 4_9, 5_1, 5_2, 5_3, 5_4, 5_5, 5_6, 5_7, 5_8, 5_9, 6_1, 6_2, 6_3, 6_4, 6_5, 6_6, 6_7, 6_8, 6_9, 7_1, 7_2, 7_3, 7_4, 7_5, 7_6, 7_7, 7_8, 7_9, 8_1, 8_2, 8_3, 8_4, 8_5, 8_6, 8_7, 8_8, 8_9, 9_1, 9_2, 9_3, 9_4, 9_6, 9_8, 9_9, 10_2, 11_6, 15_4, 15_5, 17_3, 17_5, 17_8, 17_9, 18_3, 18_6, 26_1, 28_1, 28_2, 28_4, 28_5, 29_2, 3_6, 30_1, 30_3, 30_4, 30_5, 4_5, 9_5, 9_7 | 23200 |
| 2018 | Chimney Park | 3 | BB1, BB2, EC | 10 | BB1_1, BB1_2, BB2_2, BB2_3, BB2_4, BB2_5, EC_1, EC_2, EC_6, EC_7 | 1500 |
| 2019 | Chimney Park | 5 | BB1, BB2, EC, RG, UT | 21 | BB1_1, BB1_2, BB1_4, BB2_2, BB2_3, BB2_4, BB2_5, EC_1, EC_2, EC_6, EC_7, RG_1, RG_2, RG_3, RG_4, RG_5, UT_1, UT_2, UT_3, UT_4, UT_5 | 1740 |

Supplementary Table 2: Median posterior estimates of regression parameters and their 94% upper and lower credible intervals for lodgepole pine (PICO) probabilities of attack and post-attack mortality as a function of diameter at breast height. Slopes with a credible interval that does not include zero are indicated in bold.

|  |  | |  |  |  |  | Intercept |  |  |  | Slope |  |
| --- | --- | --- | --- | --- | --- | --- | --- | --- | --- | --- | --- | --- |
|  |  | |  | R2 |  | Median | Lower 94% CI | Upper 94% CI |  | Median | Lower 94% CI | Upper 94% CI |
| PICO |  | |  |  |  |  |  |  |  |  |  |  |
|  | Attack | |  |  |  |  |  |  |  |  |  |  |
|  |  | | 2008 | 0.26 |  | -7.17 | -5.32 | -9.40 |  | **0.25** | **0.34** | **0.17** |
|  |  | | 2009 | 0.44 |  | -6.38 | -4.98 | -8.03 |  | **0.32** | **0.40** | **0.25** |
|  |  | | 2010 | 0.72 |  | -9.66 | -7.96 | -11.66 |  | **0.53** | **0.64** | **0.44** |
|  |  | | 2011 | 0.42 |  | -3.89 | -3.31 | -4.52 |  | **0.26** | **0.30** | **0.22** |
|  |  | | 2012 | 0.44 |  | -4.01 | -3.62 | -4.41 |  | **0.26** | **0.28** | **0.23** |
|  |  | | 2013 | 0.47 |  | -5.18 | -4.51 | -5.92 |  | **0.29** | **0.33** | **0.25** |
|  |  | | 2014 | 0.50 |  | -5.04 | -4.26 | -5.90 |  | **0.30** | **0.35** | **0.26** |
|  |  | | 2015 | 0.40 |  | -3.96 | -3.61 | -4.32 |  | **0.20** | **0.22** | **0.19** |
|  |  | | 2016 | 0.23 |  | -2.11 | -1.84 | -2.39 |  | **0.14** | **0.15** | **0.12** |
|  |  | | 2017 | 0.28 |  | -2.10 | -1.83 | -2.38 |  | **0.16** | **0.18** | **0.14** |
|  |  | | 2018 | 0.09 |  | -1.95 | -1.06 | -2.88 |  | **0.11** | **0.15** | **0.06** |
|  |  | | 2019 | 0.37 |  | -4.78 | -3.79 | -5.91 |  | **0.24** | **0.30** | **0.18** |
| PICO |  | |  |  |  |  |  |  |  |  |  |  |
|  | Mortality | |  |  |  |  |  |  |  |  |  |  |
|  |  | | 2008 | 0.12 |  | -6.12 | -1.01 | -12.58 |  | **0.21** | **0.45** | **0.02** |
|  |  | | 2009 | 0.12 |  | -4.58 | -2.25 | -7.17 |  | **0.20** | **0.31** | **0.10** |
|  |  | | 2010 | 0.17 |  | -4.97 | -3.00 | -7.12 |  | **0.24** | **0.34** | **0.15** |
|  |  | | 2011 | 0.23 |  | -3.14 | -2.20 | -4.14 |  | **0.20** | **0.25** | **0.15** |
|  |  | | 2012 | 0.06 |  | -0.54 | -0.01 | -1.08 |  | **0.09** | **0.11** | **0.06** |
|  |  | | 2013 | 0.01 |  | 0.21 | 1.13 | -0.70 |  | **0.04** | **0.09** | **0.00** |
|  |  | | 2014 | 0.08 |  | -1.41 | -0.47 | -2.36 |  | **0.10** | **0.14** | **0.05** |
|  |  | | 2015 | 0.06 |  | -0.88 | -0.36 | -1.42 |  | **0.08** | **0.10** | **0.06** |
|  |  | | 2016 | 0.09 |  | -1.19 | -0.80 | -1.59 |  | **0.08** | **0.10** | **0.06** |
|  |  | | 2017 | 0.12 |  | -1.81 | -1.43 | -2.19 |  | **0.09** | **0.11** | **0.08** |
|  |  | | 2018 | 0.32 |  | -4.20 | -2.63 | -6.05 |  | **0.21** | **0.29** | **0.13** |
|  |  | | 2019 | 0.08 |  | -1.38 | 0.45 | -3.32 |  | **0.11** | **0.21** | **0.03** |
| PICO |  | |  |  |  |  |  |  |  |  |  |  |
|  | Year-to-Year Mortality | | | |  |  |  |  |  |  |  |  |
|  |  | 2008 | | 0.12 |  | -6.18 | -1.01 | -12.60 |  | **0.22** | **0.46** | **0.02** |
|  |  | 2009 | | 0.09 |  | -4.28 | -1.81 | -6.99 |  | **0.17** | **0.29** | **0.06** |
|  |  | 2010 | | 0.11 |  | -4.45 | -2.16 | -7.00 |  | **0.17** | **0.28** | **0.07** |
|  |  | 2011 | | 0.10 |  | -2.49 | -1.48 | -3.62 |  | **0.12** | **0.18** | **0.06** |
|  |  | 2012 | | 0.03 |  | -1.70 | -0.89 | -2.56 |  | **0.06** | **0.10** | **0.02** |
|  |  | 2013 | | 0.04 |  | 0.33 | 2.25 | -1.50 |  | -0.09 | 0.00 | -0.19 |
|  |  | 2014 | | 0.00 |  | -4.59 | -0.85 | -10.28 |  | 0.02 | 0.25 | -0.19 |
|  |  | 2015 | | 0.03 |  | -7.23 | -4.03 | -10.97 |  | **0.14** | **0.27** | **0.02** |
|  |  | 2016 | | 0.01 |  | -2.32 | -0.75 | -4.14 |  | -0.12 | -0.01 | -0.26 |
|  |  | 2017 | | 0.01 |  | -2.78 | -1.43 | -4.38 |  | -0.09 | 0.01 | -0.19 |

Supplementary Table 3: Median posterior estimates of regression parameters and their 94% upper and lower credible intervals for subalpine fir (ABLA) and Engelmann spruce (PIEN) probabilities of attack and post-attack mortality as a function of diameter at breast height. Slopes with a credible interval that does not include zero are indicated in bold.

|  |  |  |  |  |  | Intercept |  |  |  | Slope |  |
| --- | --- | --- | --- | --- | --- | --- | --- | --- | --- | --- | --- |
|  |  |  | R2 |  | Median | Lower 94% CI | Upper 94% CI |  | Median | Lower 94% CI | Upper 94% CI |
| ABLA | |  |  |  |  |  |  |  |  |  |  |
|  | Attack |  |  |  |  |  |  |  |  |  |  |
|  |  | 2009 | 0.06 |  | -2.91 | -4.02 | -1.90 |  | **0.06** | **0.02** | **0.10** |
|  |  | 2010 | 0.04 |  | -2.14 | -3.13 | -1.23 |  | **0.05** | **0.01** | **0.09** |
|  |  | 2011 | 0.13 |  | -2.05 | -2.55 | -1.59 |  | **0.08** | **0.06** | **0.11** |
|  |  | 2014 | 0.13 |  | -2.85 | -3.76 | -2.04 |  | **0.09** | **0.05** | **0.13** |
|  |  | 2015 | 0.10 |  | -2.53 | -2.73 | -2.34 |  | **0.09** | **0.08** | **0.11** |
|  |  | 2016 | 0.14 |  | -2.40 | -2.60 | -2.21 |  | **0.11** | **0.10** | **0.12** |
|  |  | 2017 | 0.17 |  | -2.17 | -2.35 | -1.99 |  | **0.13** | **0.12** | **0.14** |
| ABLA | |  |  |  |  |  |  |  |  |  |  |
|  | Mortality |  |  |  |  |  |  |  |  |  |  |
|  |  | 2009 | 0.11 |  | -1.17 | -4.37 | 1.58 |  | **0.12** | **0.01** | **0.28** |
|  |  | 2010 | 0.05 |  | -0.68 | -2.91 | 1.18 |  | 0.06 | -0.01 | 0.17 |
|  |  | 2011 | 0.01 |  | -0.48 | -1.33 | 0.35 |  | 0.01 | -0.03 | 0.05 |
|  |  | 2014 | 0.02 |  | 0.25 | -1.85 | 2.43 |  | -0.01 | -0.11 | 0.09 |
|  |  | 2015 | 0.01 |  | 1.95 | 1.42 | 2.48 |  | -0.03 | -0.06 | 0.00 |
|  |  | 2016 | 0.00 |  | 1.14 | 0.76 | 1.53 |  | -0.01 | -0.03 | 0.02 |
|  |  | 2017 | 0.00 |  | 0.41 | 0.10 | 0.71 |  | 0.00 | -0.02 | 0.01 |
| PIEN |  |  |  |  |  |  |  |  |  |  |  |
|  | Attack |  |  |  |  |  |  |  |  |  |  |
|  |  | 2009 | 0.28 |  | -2.60 | -3.21 | -2.02 |  | **0.14** | **0.11** | **0.17** |
|  |  | 2010 | 0.17 |  | -1.48 | -2.15 | -0.86 |  | **0.13** | **0.10** | **0.17** |
|  |  | 2011 | 0.32 |  | -2.17 | -2.71 | -1.66 |  | **0.19** | **0.16** | **0.22** |
|  |  | 2012 | 0.60 |  | -4.57 | -6.02 | -3.37 |  | **0.29** | **0.22** | **0.39** |
|  |  | 2013 | 0.41 |  | -2.84 | -3.76 | -2.04 |  | **0.20** | **0.14** | **0.26** |
|  |  | 2014 | 0.45 |  | -3.46 | -4.45 | -2.59 |  | **0.19** | **0.14** | **0.25** |
|  |  | 2015 | 0.31 |  | -3.01 | -3.31 | -2.73 |  | **0.13** | **0.11** | **0.14** |
|  |  | 2016 | 0.31 |  | -2.52 | -2.81 | -2.24 |  | **0.13** | **0.12** | **0.15** |
|  |  | 2017 | 0.31 |  | -2.04 | -2.34 | -1.76 |  | **0.16** | **0.14** | **0.18** |
| PIEN |  |  |  |  |  |  |  |  |  |  |  |
|  | Mortality |  |  |  |  |  |  |  |  |  |  |
|  |  | 2009 | 0.22 |  | -3.06 | -3.77 | -2.41 |  | **0.06** | **0.05** | **0.08** |
|  |  | 2010 | 0.27 |  | -3.16 | -3.78 | -2.59 |  | **0.08** | **0.06** | **0.10** |
|  |  | 2011 | 0.21 |  | -2.14 | -2.65 | -1.65 |  | **0.09** | **0.07** | **0.11** |
|  |  | 2012 | 0.01 |  | 0.35 | -0.84 | 1.56 |  | 0.00 | -0.04 | 0.05 |
|  |  | 2013 | 0.01 |  | 0.82 | -0.12 | 1.79 |  | -0.01 | -0.05 | 0.03 |
|  |  | 2014 | 0.07 |  | 2.30 | 0.99 | 3.81 |  | **-0.05** | **-0.10** | **-0.01** |
|  |  | 2015 | 0.01 |  | 0.00 | -0.47 | 0.47 |  | **0.02** | **0.00** | **0.04** |
|  |  | 2016 | 0.00 |  | 0.22 | -0.16 | 0.61 |  | 0.01 | -0.00 | 0.03 |
|  |  | 2017 | 0.04 |  | -0.88 | -1.23 | -0.54 |  | **0.03** | **0.02** | **0.05** |

Supplementary Table 4: Linear model results (means and 94% credible intervals of posterior model parameter distributions). Slopes with a credible interval that does not include zero are indicated in bold.

| Dominance |  |  |  |  | Intercept |  |  |  | Slope |  |
| --- | --- | --- | --- | --- | --- | --- | --- | --- | --- | --- |
|  | Species | R2 |  | Median | Lower 94% CI | Upper 94% CI |  | Median | Lower 94% CI | Upper 94% CI |
| Lodgepole Pine | |  |  |  |  |  |  |  |  |  |
|  | ABLA | 0.01 |  | 0.023 | 0.004 | 0.043 |  | 0.028 | -0.037 | 0.093 |
|  | PICO | 0.19 |  | 0.221 | 0.051 | 0.389 |  | **1.343** | **0.790** | **1.890** |
|  | PIEN | 0.00 |  | 0.004 | 0.000 | 0.008 |  | -0.001 | -0.013 | 0.011 |
| Spruce-Fir |  |  |  |  |  |  |  |  |  |  |
|  | ABLA | 0.02 |  | 0.575 | 0.354 | 0.795 |  | -0.457 | -1.181 | 0.269 |
|  | PICO | 0.01 |  | 0.005 | -0.001 | 0.010 |  | -0.005 | -0.024 | 0.013 |
|  | PIEN | 0.01 |  | 0.055 | 0.031 | 0.078 |  | -0.027 | -0.104 | 0.052 |
| Mixed |  |  |  |  |  |  |  |  |  |  |
|  | ABLA | 0.05 |  | 0.283 | 0.136 | 0.438 |  | 0.561 | -0.100 | 1.210 |
|  | PICO | 0.04 |  | 0.285 | 0.024 | 0.546 |  | -0.804 | -1.939 | 0.337 |
|  | PIEN | 0.01 |  | 0.029 | 0.008 | 0.049 |  | 0.002 | -0.091 | 0.098 |
